# Supplementary material for: Spring Wheat’s Ability to Utilize Nitrogen More Effectively Is Influenced by Root Phene Variation
Source: MDPI journal article supplement (doi:10.3390/plants12051010), 2023-02-23
Supplement: s1 [file s1]

**Supplementary table:**

**Table S1:** List of 175 genotypes under study

| S.N. | Pedigree/ Genotypes          | S.N. | Pedigree/ Genotypes             |
|------|------------------------------|------|---------------------------------|
| 1    | CL1449/HUW585                | 43   | HD2948/HD2894                   |
| 2    | DL672/PS6270//DE8            | 44   | PS755/HD29                      |
| 3    | HW5015/UP2538                | 45   | PS755/PBW502                    |
| 4    | HD2898/HD29                  | 46   | CL1705/HD2894                   |
| 5    | HD2953/HS365                 | 47   | CL1705/HD2894                   |
| 6    | CL1449/PBW343                | 48   | HD2851/HD2329                   |
| 7    | HD2878/HD29                  | 49   | HD2851/HD2329                   |
| 8    | CL2636                       | 50   | VL610/KUNDAN                    |
| 9    | PBW343/HD2877                | 51   | PBW343/PICCI LOCAL//RL6080      |
| 10   | 18-HRWYT-214                 | 52   | HW3083/HD2639                   |
| 11   | 18-SAWYT-303                 | 53   | HW3083/HD2639                   |
| 12   | HD2448/HW1305                | 54   | HW3083/HD2639                   |
| 13   | HW4023/HW5028//HD2932/DW1309 | 55   | HW3083/HD2639                   |
| 14   | HD2833/DW538                 | 56   | DWG107/RAJ 3765                 |
| 15   | 39 <sup>th</sup> IBWSN-23    | 57   | DWG107/RAJ 3765                 |
| 16   | 29 <sup>th</sup> SAWSN-3145  | 58   | WH542/UP290//DBW72              |
| 17   | CSW 43                       | 59   | CL 2596/K9451//CI882/HD2329     |
| 18   | HD2932/UP2425                | 60   | DWG107/HDK-10//C306             |
| 19   | WL462/VCC/KOCL/3/Pes/Me-11   | 61   | DWG107/HDK-10//C306             |
| 20   | UP2425/CL146                 | 62   | DWG107/HDK-10//C306             |
| 21   | JOSHI 3                      | 63   | HD3239/WR562                    |
| 22   | HD2967/DW1350                | 64   | DL5/PBW343//DEEPALI             |
| 23   | HD2448/HW1305                | 65   | DL5/PBW343//DEEPALI             |
| 24   | HD2878/HD29                  | 66   | DL5/PBW343//HD2891              |
| 25   | CL1705/PBW12                 | 67   | DL5/PBW343//DEEPALI             |
| 26   | CL1705/HD2894                | 68   | DL5/PBW343//HD2891              |
| 27   | HD2824/VL796                 | 69   | DL5/PBW343//HD2891              |
| 28   | VL610/KUNDAN                 | 70   | DL5/PBW343//HD2891              |
| 29   | 31-ESWYT-132                 | 71   | DL5/PBW343//HD2891              |
| 30   | 5-EBWYT-519                  | 72   | CL2596/K9451//CL882/HD2009      |
| 31   | 43-IBWSN-1006                | 73   | G-9/ MC-10                      |
| 32   | 43-IBWSN-1077                | 74   | G-9/MC-10                       |
| 33   | 43-IBWSN-1090                | 75   | CL22596/K9451//CL882/HD2329     |
| 34   | 43-IBWSN-1102                | 76   | CP264/CL1633//CNO 63/WELLINGTON |
| 35   | 43-IBWSN-1106                | 77   | CL 2596/K9451//CI882/HD2329     |
| 36   | 43-IBWSN-1153                | 78   | CL2596/K9451/CL882//HD2009      |
| 37   | 43-IBWSN-1182                | 79   | CL2596/K9451/CL882//HD2009      |
| 38   | 43-IBWSN-1187                | 80   | HD2669/HD3016                   |
| 39   | 29-SAWN-3028                 | 81   | HD2669/HD3016                   |
| 40   | HW5028/HD2250                | 82   | HD2967/HUW631                   |
| 41   | HW2930/DW1309                | 83   | HD2967/DBW17                    |
| 42   | HD2948/HD2894                | 84   | HD2967/DBW17                    |

|     |                  |     |                               |
|-----|------------------|-----|-------------------------------|
| 85  | HD2967/HD3024    | 128 | HD 3090                       |
| 86  | HD2967/HD3024    | 129 | HD 3059                       |
| 87  | HD2967/HD3024    | 130 | HD 3086                       |
| 88  | HD2967/DBW54     | 131 | GW 366                        |
| 89  | HD2967/DBW56     | 132 | WL 711                        |
| 90  | HD2967/K-07-08   | 133 | K 9107                        |
| 91  | HD2967/WH1073    | 134 | 43IBWSN-1201                  |
| 92  | HD2967/WH1073    | 135 | 28SAWSN-3012                  |
| 93  | HD2967/PBW 617   | 136 | 43-IBWSN-1054                 |
| 94  | HD2967/PBW 596   | 137 | 43-IBWSN-1187                 |
| 95  | HD2967/DT2756    | 138 | 28-SAWSN-3028                 |
| 96  | HD2967/HD3024    | 139 | CL1705/HD2894                 |
| 97  | HD2967/HD3034    | 140 | HW3083/HD2873                 |
| 98  | HD2967/HD3034    | 141 | HD3117                        |
| 99  | HD2967/HD3035    | 142 | CSW16                         |
| 100 | HD2967/HD3035    | 143 | DL849/YSCN-08                 |
| 101 | HD2967/DT2761    | 144 | DL672/P66.270//DE894/3/CUMYN  |
| 102 | HD2967/DT2761    | 145 | HD2329/WR544//PBW343/NW2041   |
| 103 | HD2967/DT2761    | 146 | 18SAWYT-311                   |
| 104 | HI 1544          | 147 | 18HRWYT-214                   |
| 105 | HI1563           | 148 | 18 <sup>th</sup> SAWYT 36     |
| 106 | HI 1500          | 149 | HD2733/PBW343/HD2733/PBW343   |
| 107 | HI1531           | 150 | WH542/YSCN-10                 |
| 108 | RAJ 4120         | 151 | HD2687/HP1896//WH542          |
| 109 | RAJ 3765         | 152 | CSW44                         |
| 110 | RAJ 4083         | 153 | PBW12/HW2078                  |
| 111 | DBW-14           | 154 | HD2824/VL796                  |
| 112 | DBW17            | 155 | HD2402/CPAN4067/HW4022/DW5247 |
| 113 | WH 542           | 156 | UP2425/UP2626                 |
| 114 | PBW 621-50       | 157 | HD2733/HD2329                 |
| 115 | PBW 596          | 158 | VL849/UP2571                  |
| 116 | PBW 590          | 159 | HD2733/PBW343/HD2733/PBW343   |
| 117 | PBW 502          | 160 | IBWSN-06-07 KARNAL            |
| 118 | PBW 443          | 161 | HD2877/HS451                  |
| 119 | PBW 373          | 162 | CL1591/CL1475                 |
| 120 | PBW 343          | 163 | 31 ESWYT121                   |
| 121 | HD 2285          | 164 | 6 <sup>th</sup> EBYT-503      |
| 122 | HD 2894          | 165 | CL1705/HD2687                 |
| 123 | HD 2932          | 166 | CL1705/HD2687                 |
| 124 | HD 2985          | 167 | CL1705/HD2687                 |
| 125 | HD 2987          | 168 | CL264//CL1633/CNO-601         |
| 126 | HD 3043          | 169 | CL264//CL1633/CNO-601         |
| 127 | HD 2329          | 170 | CL264//CL1633/CNO-601         |
| 171 | EGPSN-36/PBW 343 | 174 | CL2596/K9451/CL882//HD2009    |
| 172 | EGPSN-36/PBW 343 | 175 | CL2596/K9451/CL882//HD2009    |
| 173 | EGPSN-36/PBW343  |     |                               |

**Table S2:** List of 19 subset genotypes screened under hydroponics and pot

| SN                                             | Table S1 | Pedigree/Genotypes           | Weight (gm) |
|------------------------------------------------|----------|------------------------------|-------------|
| <b>On the basis of mean shoot dry weight</b>   |          |                              |             |
| 1                                              | 154      | HD2824/VL796                 | 1.88        |
| 2                                              | 144      | DL672/P66.270//DE894/3/CUMYN | 1.12        |
| 3                                              | 151      | HD2687/HP1896//WH542         | 1.51        |
| 4                                              | 152      | CSW44                        | 1.195       |
| 5                                              | 84       | HD2967/DBW17                 | 0.195       |
| 6                                              | 128      | HD 3090                      | 0.31        |
| 7                                              | 5        | HD2953/HS365                 | 0.265       |
| <b>On the basis of mean Nitrogen efficient</b> |          |                              |             |
| 8                                              | 86       | HD2967/HD3024                | 0.775       |
| 9                                              | 78       | CL2596/K9451/CL882//HD2009   | 0.615       |
| 10                                             | 101      | HD2967/DT2761                | 0.595       |
| 11                                             | 114      | PBW 621-50                   | 0.08        |
| 12                                             | 51       | PBW343/PICCI LOCAL//RL6080   | 0.11        |
| 13                                             | 92       | HD2967/WH1073                | 0.11        |
| <b>On the basis of mean root dry weight</b>    |          |                              |             |
| 14                                             | 173      | EGPSN-36/PBW 343             | 0.1875      |
| 15                                             | 171      | EGPSN-36/PBW 343             | 0.1435      |
| 16                                             | 143      | DL849/YSCN-08                | 0.186       |
| 17                                             | 89       | HD2967/DBW56                 | 0.0165      |
| 18                                             | 71       | DL5/PBW343//HD2891           | 0.019       |
| 19                                             | 99       | HD2967/HD3035                | 0.0235      |

**Table S3:** Clustering pattern of 175 spring wheat genotypes (Table S1) on the basis of morpho-physiological traits for NUE under high nitrogen (HN)

| Cluster | Genotype No.                                                                                                                                                                                                                                                                                                                                                                                                                                                                                                                                                                                                                                                                                                                                                  |
|---------|---------------------------------------------------------------------------------------------------------------------------------------------------------------------------------------------------------------------------------------------------------------------------------------------------------------------------------------------------------------------------------------------------------------------------------------------------------------------------------------------------------------------------------------------------------------------------------------------------------------------------------------------------------------------------------------------------------------------------------------------------------------|
| I (160) | 83, 100, 39, 47, 20, 85, 73, 59, 1, 30, 6, 21, 165, 26, 18, 17, 56, 91, 34, 13, 41, 36, 60, 95, 67, 98, 94, 58, 104, 62, 22, 3, 50, 49, 70, 4, 65, 64, 52, 158, 99, 45, 66, <b>5</b> , 106, 11, 87, 108, 14, 24, 10, 71, 156, 75, 74, 93, 168, 25, 53, 103, 92, 76, 48, 63, 136, 15, 8, 27, 28, 123, 51, 72, 54, 42, 61, 82, 43, 81, 33, 55, 101, 46, 77, 90, 111, 102, 35, 2, 130, 96, 16, 29, 148, 164, 114, 89, 88, <b>84</b> , 150, 124, 38, 131, 163, 139, 135, 167, 19, 105, 80, 147, 7, 137, 32, 129, 69, 57, 142, 117, 37, 157, 44, 132, 109, 97, 118, 121, 78, 175, 116, 115, 107, 133, 169, 149, 159, 40, 68, 141, <b>128</b> , 122, 112, <b>152</b> , <b>144</b> , 125, 146, 113, 23, 138, 12, 126, 170, 134, 31, 174, 119, 140, 86, 145, 110, 160 |
| II (1)  | 127                                                                                                                                                                                                                                                                                                                                                                                                                                                                                                                                                                                                                                                                                                                                                           |
| III (1) | 162                                                                                                                                                                                                                                                                                                                                                                                                                                                                                                                                                                                                                                                                                                                                                           |
| IV (11) | 143, 153, 166, 155, 173, 172, 9, 171, <b>151</b> , 161, 120                                                                                                                                                                                                                                                                                                                                                                                                                                                                                                                                                                                                                                                                                                   |
| V (1)   | <b>154</b>                                                                                                                                                                                                                                                                                                                                                                                                                                                                                                                                                                                                                                                                                                                                                    |
| VI (1)  | 79                                                                                                                                                                                                                                                                                                                                                                                                                                                                                                                                                                                                                                                                                                                                                            |

() indicate numbers of genotypes accommodated in the cluster

**Table S4:** Clustering pattern of 175 spring wheat genotypes (Table S1) on the basis of morpho-physiological traits for NUE under low nitrogen (LN)

| Cluster  | Genotype No.                                                                                                                                                                                                                                                                                                                                                                                                                                                                                                                                                                                                                             |
|----------|------------------------------------------------------------------------------------------------------------------------------------------------------------------------------------------------------------------------------------------------------------------------------------------------------------------------------------------------------------------------------------------------------------------------------------------------------------------------------------------------------------------------------------------------------------------------------------------------------------------------------------------|
| I (136)  | 74, 106, 65, 118, 39, 11, 169, 141, 29, 167, 164, 128, 109, 175, 163, 138, 165, 18, 69, 143, 131, 75, 146, 156, 105, 129, 149, 113, 45, 134, 104, 132, 71, 8, 10, 44, 145, 117, 33, 25, 84, 107, 130, 35, 37, 171, 111, 68, 12, 127, 172, 159, 115, 27, 13, 5, 120, 90, 126, 40, 160, 123, 152, 137, 155, 7, 153, 124, 34, 157, 147, 170, 60, 108, 26, 89, 173, 135, 20, 116, 17, 62, 53, 2, 16, 9, 77, 148, 32, 59, 52, 67, 73, 6, 158, 64, 70, 142, 61, 22, 21, 43, 31, 144, 122, 139, 30, 125, 46, 47, 63, 24, 42, 133, <b>51, 92</b> , 66, 50, 140, 174, 15, 136, 55, 57, 150, 76, 121, 151, 28, 23, 80, 154, 1, 19, 110, <b>114</b> |
| II (22)  | 41, 161, 79, 94, 98, 85, 103, 88, <b>101, 78</b> , 99, 100, 102, 83, 82, 81, 87, 97, 3, 93, 38, 36                                                                                                                                                                                                                                                                                                                                                                                                                                                                                                                                       |
| III (10) | 56, 58, 54, 166, 72, 168, 48, 162, 96, 14                                                                                                                                                                                                                                                                                                                                                                                                                                                                                                                                                                                                |
| IV (1)   | 119                                                                                                                                                                                                                                                                                                                                                                                                                                                                                                                                                                                                                                      |
| V (1)    | 112                                                                                                                                                                                                                                                                                                                                                                                                                                                                                                                                                                                                                                      |
| VI (1)   | 91                                                                                                                                                                                                                                                                                                                                                                                                                                                                                                                                                                                                                                       |
| VII (1)  | 95                                                                                                                                                                                                                                                                                                                                                                                                                                                                                                                                                                                                                                       |
| VIII (1) | 49                                                                                                                                                                                                                                                                                                                                                                                                                                                                                                                                                                                                                                       |
| IX (1)   | <b>86</b>                                                                                                                                                                                                                                                                                                                                                                                                                                                                                                                                                                                                                                |
| X (1)    | 4                                                                                                                                                                                                                                                                                                                                                                                                                                                                                                                                                                                                                                        |

() indicate numbers of genotypes accommodated in cluster

**Table S5:** Average intra and inter cluster  $D^2$  values of different clusters under HN

| Cluster | I           | II       | III      | IV           | V        | VI       |
|---------|-------------|----------|----------|--------------|----------|----------|
| I       | <b>10.9</b> |          |          |              |          |          |
| II      | 18.21       | <b>0</b> |          |              |          |          |
| III     | 19.26       | 12.45    | <b>0</b> |              |          |          |
| IV      | 25.94       | 11.91    | 15.01    | <b>13.22</b> |          |          |
| V       | 39.44       | 26.79    | 24.27    | 21.86        | <b>0</b> |          |
| VI      | 22.87       | 26.03    | 21.15    | 29.89        | 37.34    | <b>0</b> |

**Table S6:** Average intra and inter cluster  $D^2$  values of different clusters under LN

| Cluster | I           | II          | III         | IV       | V        | VI       | VII      | VIII     | IX       | X        |
|---------|-------------|-------------|-------------|----------|----------|----------|----------|----------|----------|----------|
| I       | <b>8.41</b> |             |             |          |          |          |          |          |          |          |
| II      | 17.97       | <b>9.07</b> |             |          |          |          |          |          |          |          |
| III     | 13.45       | 25.72       | <b>10.4</b> |          |          |          |          |          |          |          |
| IV      | 12.8        | 13.6        | 22.21       | <b>0</b> |          |          |          |          |          |          |
| V       | 15.93       | 13.7        | 25.54       | 3.54     | <b>0</b> |          |          |          |          |          |
| VI      | 13.18       | 15.02       | 15.77       | 18.38    | 20.83    | <b>0</b> |          |          |          |          |
| VII     | 21.9        | 14.32       | 25.84       | 23.11    | 24.19    | 10.84    | <b>0</b> |          |          |          |
| VIII    | 18.77       | 24.58       | 15.25       | 27.28    | 30.16    | 10.94    | 18.33    | <b>0</b> |          |          |
| IX      | 26.53       | 13.73       | 33.06       | 23.39    | 22.97    | 20.2     | 14.01    | 27.89    | <b>0</b> |          |
| X       | 14.24       | 24.64       | 15.71       | 18.81    | 21.65    | 19.43    | 27.94    | 22.38    | 32.94    | <b>0</b> |

**Table S7:** Eigen vectors for different NUE traits under HN

|      | PC1          | PC2           | PC3           | PC4           | PC5           | PC6           | PC7           | PC8           | PC9           | PC10          |
|------|--------------|---------------|---------------|---------------|---------------|---------------|---------------|---------------|---------------|---------------|
| SDW  | <b>0.452</b> | 0.007         | -0.166        | 0.140         | -0.023        | -0.096        | <b>0.352</b>  | 0.261         | <b>-0.739</b> | -0.013        |
| RDW  | <b>0.258</b> | <b>-0.530</b> | 0.057         | 0.074         | 0.334         | <b>-0.612</b> | <b>-0.395</b> | -0.016        | 0.029         | -0.012        |
| MRL  | 0.156        | <b>-0.470</b> | 0.009         | <b>-0.504</b> | <b>-0.706</b> | 0.037         | -0.014        | -0.005        | 0.003         | -0.003        |
| PH   | 0.184        | 0.262         | -0.291        | <b>-0.792</b> | <b>0.428</b>  | -0.015        | -0.036        | 0.018         | 0.008         | 0.001         |
| R:S  | -0.076       | <b>-0.595</b> | 0.206         | -0.071        | <b>0.453</b>  | <b>0.518</b>  | <b>0.344</b>  | 0.012         | -0.026        | 0.012         |
| N%   | 0.131        | 0.178         | <b>0.640</b>  | -0.115        | 0.010         | 0.140         | <b>-0.319</b> | <b>0.637</b>  | -0.029        | -0.020        |
| gN   | <b>0.463</b> | 0.071         | 0.044         | 0.112         | 0.003         | <b>0.324</b>  | -0.229        | <b>-0.345</b> | 0.035         | <b>-0.699</b> |
| NUpE | <b>0.463</b> | 0.069         | 0.043         | 0.112         | -0.003        | <b>0.309</b>  | <b>-0.254</b> | -0.309        | 0.013         | <b>0.714</b>  |
| NUtE | -0.123       | -0.182        | <b>-0.635</b> | 0.164         | -0.007        | <b>0.348</b>  | <b>-0.459</b> | <b>0.435</b>  | -0.013        | -0.016        |
| NUE  | <b>0.452</b> | 0.006         | -0.162        | 0.150         | -0.025        | -0.069        | <b>0.413</b>  | <b>0.348</b>  | <b>0.670</b>  | 0.008         |

**Table S8:** Eigen vectors for different NUE traits under LN

|      | PC1          | PC2           | PC3           | PC4           | PC5          | PC6          | PC7           | PC8           | PC9           | PC10          |
|------|--------------|---------------|---------------|---------------|--------------|--------------|---------------|---------------|---------------|---------------|
| SDW  | <b>0.433</b> | 0.167         | 0.022         | -0.024        | -0.124       | -0.275       | -0.171        | -0.028        | <b>0.404</b>  | <b>-0.707</b> |
| RDW  | <b>0.426</b> | 0.152         | 0.181         | -0.092        | -0.060       | -0.266       | -0.136        | -0.125        | <b>-0.803</b> | -0.001        |
| MRL  | 0.197        | -0.032        | <b>-0.491</b> | <b>-0.504</b> | <b>0.682</b> | -0.005       | -0.011        | -0.007        | 0.000         | 0.000         |
| PH   | 0.126        | 0.229         | 0.114         | <b>0.743</b>  | <b>0.605</b> | 0.029        | -0.027        | -0.002        | 0.001         | 0.000         |
| R:S  | -0.020       | -0.075        | <b>0.844</b>  | <b>-0.376</b> | 0.333        | 0.077        | 0.026         | 0.017         | 0.151         | 0.000         |
| N%   | 0.080        | <b>-0.643</b> | 0.000         | 0.128         | 0.029        | 0.164        | <b>-0.715</b> | -0.154        | -0.005        | 0.000         |
| gN   | <b>0.432</b> | -0.154        | -0.002        | 0.046         | -0.095       | <b>0.499</b> | <b>0.430</b>  | <b>-0.585</b> | 0.054         | -0.001        |
| NUpE | <b>0.435</b> | -0.146        | 0.005         | 0.035         | -0.091       | <b>0.391</b> | 0.105         | <b>0.782</b>  | -0.062        | 0.002         |
| NUtE | -0.082       | <b>0.635</b>  | -0.020        | -0.155        | -0.079       | <b>0.584</b> | <b>-0.462</b> | -0.069        | -0.009        | 0.000         |
| NUE  | <b>0.433</b> | 0.167         | 0.023         | -0.024        | -0.124       | -0.276       | -0.170        | -0.032        | <b>0.402</b>  | <b>0.708</b>  |

SDW: Shoot dry weight (gm), RDW: Root dry weight (gm), TDW: Total dry weight (gm), R:S: Root- shoot ratio, MRL: Maximum root length (cm), N%: Nitrogen percentage in shoot (%), gN: Gram N in shoot (gm), NUpE: Nitrogen uptake efficiency, NUtE: Nitrogen utilization efficiency, NUE: Nitrogen use efficiency
